# Supplementary material for: Computationally identifying virulence factors based on KEGG pathways
Source: Royal Society of Chemistry journal article supplement (doi:10.1039/c3mb70024k), 2013-03-08
Supplement: c3mb70024k.pdf [file c3mb70024k.pdf]

## Supplementary Materials S1: The output of mRMR method for three species

### 1. The output of mRMR method for CJE

#### (1) MaxRel features list

| Order | Feature name | Score |
|-------|--------------|-------|
| 1     | cje02040     | 0.125 |
| 2     | cje00521     | 0.104 |
| 3     | cje00523     | 0.104 |
| 4     | cje02030     | 0.101 |
| 5     | cje00520     | 0.096 |
| 6     | cje00040     | 0.089 |
| 7     | cje00500     | 0.076 |
| 8     | cje02020     | 0.074 |
| 9     | cje00540     | 0.059 |
| 10    | cje03018     | 0.041 |
| 11    | cje00052     | 0.034 |
| 12    | cje00920     | 0.028 |
| 13    | cje00051     | 0.026 |
| 14    | cje03010     | 0.025 |
| 15    | cje00650     | 0.022 |
| 16    | cje03440     | 0.02  |
| 17    | cje04122     | 0.02  |
| 18    | cje03060     | 0.02  |
| 19    | cje01120     | 0.019 |
| 20    | cje00010     | 0.019 |
| 21    | cje00350     | 0.019 |
| 22    | cje00730     | 0.018 |
| 23    | cje00670     | 0.017 |
| 24    | cje00740     | 0.017 |
| 25    | cje00401     | 0.016 |
| 26    | cje00620     | 0.016 |
| 27    | cje00680     | 0.015 |
| 28    | cje00300     | 0.014 |
| 29    | cje00360     | 0.014 |
| 30    | cje00240     | 0.012 |
| 31    | cje00460     | 0.012 |
| 32    | cje00630     | 0.011 |
| 33    | cje00330     | 0.011 |
| 34    | cje03410     | 0.011 |
| 35    | cje00230     | 0.01  |
| 36    | cje00770     | 0.01  |

|    |          |       |
|----|----------|-------|
| 37 | cje00660 | 0.01  |
| 38 | cje00380 | 0.01  |
| 39 | cje00550 | 0.01  |
| 40 | cje03070 | 0.01  |
| 41 | cje00190 | 0.009 |
| 42 | cje03420 | 0.009 |
| 43 | cje01110 | 0.009 |
| 44 | cje03430 | 0.009 |
| 45 | cje00270 | 0.009 |
| 46 | cje00030 | 0.008 |
| 47 | cje00970 | 0.007 |
| 48 | cje00760 | 0.007 |
| 49 | cje00471 | 0.007 |
| 50 | cje00640 | 0.006 |
| 51 | cje03030 | 0.005 |
| 52 | cje00290 | 0.005 |
| 53 | cje00250 | 0.005 |
| 54 | cje00260 | 0.005 |
| 55 | cje00860 | 0.005 |
| 56 | cje00061 | 0.004 |
| 57 | cje00473 | 0.004 |
| 58 | cje00310 | 0.002 |
| 59 | cje00340 | 0.002 |
| 60 | cje00564 | 0.002 |
| 61 | cje00910 | 0.002 |
| 62 | cje02010 | 0.002 |
| 63 | cje00410 | 0.002 |
| 64 | cje00280 | 0.002 |
| 65 | cje00130 | 0.002 |
| 66 | cje00400 | 0.001 |
| 67 | cje00900 | 0.001 |
| 68 | cje03020 | 0.001 |
| 69 | cje00624 | 0.001 |
| 70 | cje00450 | 0     |
| 71 | cje00750 | 0     |
| 72 | cje00720 | 0     |
| 73 | cje00790 | 0     |
| 74 | cje00562 | 0     |
| 75 | cje00430 | 0     |
| 76 | cje00480 | 0     |
| 77 | cje01040 | 0     |
| 78 | cje00561 | 0     |
| 79 | cje01100 | 0     |

|    |          |   |
|----|----------|---|
| 80 | cje00020 | 0 |
|----|----------|---|

(2) mRMR features list

| Order | Feature name | Score |
|-------|--------------|-------|
| 1     | cje02040     | 0.125 |
| 2     | cje00521     | 0.102 |
| 3     | cje03018     | 0.03  |
| 4     | cje00520     | 0.034 |
| 5     | cje02030     | 0.027 |
| 6     | cje00040     | 0.024 |
| 7     | cje03440     | 0.015 |
| 8     | cje00540     | 0.015 |
| 9     | cje00010     | 0.015 |
| 10    | cje00650     | 0.015 |
| 11    | cje02020     | 0.018 |
| 12    | cje00523     | 0.015 |
| 13    | cje00740     | 0.014 |
| 14    | cje03010     | 0.014 |
| 15    | cje04122     | 0.015 |
| 16    | cje00500     | 0.016 |
| 17    | cje00730     | 0.013 |
| 18    | cje00670     | 0.012 |
| 19    | cje00300     | 0.011 |
| 20    | cje00620     | 0.011 |
| 21    | cje00350     | 0.01  |
| 22    | cje03060     | 0.01  |
| 23    | cje00920     | 0.009 |
| 24    | cje00460     | 0.008 |
| 25    | cje01120     | 0.008 |
| 26    | cje00330     | 0.007 |
| 27    | cje00550     | 0.007 |
| 28    | cje00770     | 0.007 |
| 29    | cje00052     | 0.007 |
| 30    | cje03410     | 0.007 |
| 31    | cje00230     | 0.006 |
| 32    | cje00680     | 0.006 |
| 33    | cje00051     | 0.006 |
| 34    | cje03420     | 0.005 |
| 35    | cje00240     | 0.005 |
| 36    | cje00380     | 0.005 |
| 37    | cje00760     | 0.004 |
| 38    | cje00970     | 0.004 |
| 39    | cje00860     | 0.004 |

|    |          |        |
|----|----------|--------|
| 40 | cje00190 | 0.004  |
| 41 | cje03430 | 0.003  |
| 42 | cje00270 | 0.003  |
| 43 | cje00660 | 0.003  |
| 44 | cje03070 | 0.003  |
| 45 | cje00401 | 0.003  |
| 46 | cje00030 | 0.002  |
| 47 | cje00630 | 0.002  |
| 48 | cje00061 | 0.002  |
| 49 | cje00471 | 0.002  |
| 50 | cje00473 | 0.001  |
| 51 | cje00250 | 0.001  |
| 52 | cje00564 | 0      |
| 53 | cje00260 | 0      |
| 54 | cje00130 | 0      |
| 55 | cje00910 | -0.001 |
| 56 | cje02010 | -0.001 |
| 57 | cje00310 | -0.001 |
| 58 | cje00624 | -0.001 |
| 59 | cje00290 | -0.001 |
| 60 | cje03030 | -0.001 |
| 61 | cje00640 | -0.001 |
| 62 | cje00360 | -0.001 |
| 63 | cje00480 | -0.001 |
| 64 | cje01040 | -0.002 |
| 65 | cje00562 | -0.001 |
| 66 | cje00410 | -0.002 |
| 67 | cje00750 | -0.002 |
| 68 | cje00790 | -0.002 |
| 69 | cje01110 | -0.002 |
| 70 | cje00780 | -0.002 |
| 71 | cje00900 | -0.002 |
| 72 | cje03020 | -0.003 |
| 73 | cje00561 | -0.004 |
| 74 | cje00430 | -0.004 |
| 75 | cje00280 | -0.004 |
| 76 | cje00450 | -0.005 |
| 77 | cje00400 | -0.005 |
| 78 | cje00340 | -0.006 |
| 79 | cje00720 | -0.007 |
| 80 | cje00020 | -0.011 |
| 81 | cje01100 | -0.014 |

2. The output of mRMR method for ECP

(1) MaxRel features list

| Order | Name     | Score |
|-------|----------|-------|
| 1     | ecp03070 | 0.052 |
| 2     | ecp01100 | 0.048 |
| 3     | ecp01110 | 0.037 |
| 4     | ecp03020 | 0.031 |
| 5     | ecp00340 | 0.031 |
| 6     | ecp00900 | 0.028 |
| 7     | ecp02010 | 0.028 |
| 8     | ecp00300 | 0.026 |
| 9     | ecp00230 | 0.026 |
| 10    | ecp00440 | 0.025 |
| 11    | ecp03060 | 0.025 |
| 12    | ecp00240 | 0.025 |
| 13    | ecp00660 | 0.025 |
| 14    | ecp00520 | 0.022 |
| 15    | ecp00523 | 0.021 |
| 16    | ecp01120 | 0.021 |
| 17    | ecp00190 | 0.02  |
| 18    | ecp00670 | 0.02  |
| 19    | ecp00623 | 0.02  |
| 20    | ecp03420 | 0.02  |
| 21    | ecp00521 | 0.02  |
| 22    | ecp00500 | 0.02  |
| 23    | ecp00590 | 0.019 |
| 24    | ecp00760 | 0.019 |
| 25    | ecp00020 | 0.019 |
| 26    | ecp02060 | 0.017 |
| 27    | ecp00010 | 0.017 |
| 28    | ecp00250 | 0.017 |
| 29    | ecp00550 | 0.017 |
| 30    | ecp00720 | 0.016 |
| 31    | ecp00290 | 0.015 |
| 32    | ecp03030 | 0.015 |
| 33    | ecp03018 | 0.015 |
| 34    | ecp00061 | 0.015 |
| 35    | ecp03440 | 0.014 |
| 36    | ecp00051 | 0.014 |
| 37    | ecp00471 | 0.014 |
| 38    | ecp00592 | 0.014 |
| 39    | ecp00473 | 0.014 |

|    |          |       |
|----|----------|-------|
| 40 | ecp00361 | 0.014 |
| 41 | ecp00364 | 0.014 |
| 42 | ecp00052 | 0.014 |
| 43 | ecp00643 | 0.013 |
| 44 | ecp01040 | 0.013 |
| 45 | ecp00790 | 0.013 |
| 46 | ecp00330 | 0.013 |
| 47 | ecp03410 | 0.012 |
| 48 | ecp00400 | 0.012 |
| 49 | ecp00770 | 0.011 |
| 50 | ecp03010 | 0.011 |
| 51 | ecp00750 | 0.011 |
| 52 | ecp00260 | 0.011 |
| 53 | ecp00562 | 0.011 |
| 54 | ecp00910 | 0.011 |
| 55 | ecp00030 | 0.011 |
| 56 | ecp00785 | 0.011 |
| 57 | ecp04122 | 0.011 |
| 58 | ecp00450 | 0.011 |
| 59 | ecp00730 | 0.01  |
| 60 | ecp00280 | 0.01  |
| 61 | ecp00401 | 0.009 |
| 62 | ecp00511 | 0.009 |
| 63 | ecp00930 | 0.009 |
| 64 | ecp00903 | 0.009 |
| 65 | ecp00040 | 0.008 |
| 66 | ecp00740 | 0.008 |
| 67 | ecp00480 | 0.008 |
| 68 | ecp00640 | 0.008 |
| 69 | ecp00380 | 0.007 |
| 70 | ecp00410 | 0.007 |
| 71 | ecp00650 | 0.007 |
| 72 | ecp00630 | 0.007 |
| 73 | ecp00680 | 0.006 |
| 74 | ecp00860 | 0.006 |
| 75 | ecp00281 | 0.006 |
| 76 | ecp00310 | 0.006 |
| 77 | ecp00633 | 0.006 |
| 78 | ecp00540 | 0.005 |
| 79 | ecp00053 | 0.004 |
| 80 | ecp00270 | 0.004 |
| 81 | ecp00071 | 0.004 |
| 82 | ecp00561 | 0.004 |

|     |          |       |
|-----|----------|-------|
| 83  | ecp00430 | 0.004 |
| 84  | ecp00920 | 0.004 |
| 85  | ecp00620 | 0.004 |
| 86  | ecp01053 | 0.003 |
| 87  | ecp00564 | 0.002 |
| 88  | ecp02020 | 0.002 |
| 89  | ecp00360 | 0.002 |
| 90  | ecp00970 | 0.002 |
| 91  | ecp00350 | 0.002 |
| 92  | ecp00627 | 0.002 |
| 93  | ecp00600 | 0.002 |
| 94  | ecp00460 | 0.001 |
| 95  | ecp03430 | 0.001 |
| 96  | ecp00780 | 0.001 |
| 97  | ecp00130 | 0.001 |
| 98  | ecp02040 | 0.001 |
| 99  | ecp00363 | 0.001 |
| 100 | ecp00362 | 0     |
| 101 | ecp00625 | 0     |
| 102 | ecp00626 | 0     |

(2) mRMR features list

| Order | Name     | Score |
|-------|----------|-------|
| 1     | ecp03070 | 0.052 |
| 2     | ecp01100 | 0.035 |
| 3     | ecp03020 | 0.027 |
| 4     | ecp02010 | 0.019 |
| 5     | ecp00440 | 0.018 |
| 6     | ecp00520 | 0.019 |
| 7     | ecp00590 | 0.017 |
| 8     | ecp00340 | 0.018 |
| 9     | ecp00900 | 0.017 |
| 10    | ecp00230 | 0.017 |
| 11    | ecp00623 | 0.016 |
| 12    | ecp00300 | 0.017 |
| 13    | ecp03060 | 0.016 |
| 14    | ecp00523 | 0.015 |
| 15    | ecp00010 | 0.013 |
| 16    | ecp00660 | 0.013 |
| 17    | ecp03420 | 0.013 |
| 18    | ecp00760 | 0.013 |
| 19    | ecp00250 | 0.013 |
| 20    | ecp00550 | 0.012 |

|    |          |       |
|----|----------|-------|
| 21 | ecp00670 | 0.012 |
| 22 | ecp01110 | 0.012 |
| 23 | ecp01040 | 0.012 |
| 24 | ecp00190 | 0.012 |
| 25 | ecp00592 | 0.011 |
| 26 | ecp00500 | 0.011 |
| 27 | ecp00061 | 0.01  |
| 28 | ecp00240 | 0.009 |
| 29 | ecp00361 | 0.009 |
| 30 | ecp04122 | 0.009 |
| 31 | ecp00785 | 0.009 |
| 32 | ecp00473 | 0.009 |
| 33 | ecp00562 | 0.009 |
| 34 | ecp00750 | 0.009 |
| 35 | ecp00051 | 0.009 |
| 36 | ecp01120 | 0.009 |
| 37 | ecp00790 | 0.008 |
| 38 | ecp00521 | 0.009 |
| 39 | ecp00643 | 0.009 |
| 40 | ecp03030 | 0.009 |
| 41 | ecp00511 | 0.008 |
| 42 | ecp03018 | 0.008 |
| 43 | ecp00471 | 0.007 |
| 44 | ecp00730 | 0.007 |
| 45 | ecp00290 | 0.007 |
| 46 | ecp00052 | 0.006 |
| 47 | ecp00020 | 0.006 |
| 48 | ecp00330 | 0.006 |
| 49 | ecp00450 | 0.005 |
| 50 | ecp03410 | 0.005 |
| 51 | ecp03010 | 0.005 |
| 52 | ecp00860 | 0.005 |
| 53 | ecp00910 | 0.005 |
| 54 | ecp02060 | 0.005 |
| 55 | ecp03440 | 0.005 |
| 56 | ecp00400 | 0.005 |
| 57 | ecp00030 | 0.005 |
| 58 | ecp00633 | 0.004 |
| 59 | ecp00480 | 0.004 |
| 60 | ecp00040 | 0.004 |
| 61 | ecp00364 | 0.004 |
| 62 | ecp00410 | 0.003 |
| 63 | ecp00260 | 0.003 |



|     |          |        |
|-----|----------|--------|
| 64  | ecp00740 | 0.003  |
| 65  | ecp00540 | 0.003  |
| 66  | ecp00770 | 0.003  |
| 67  | ecp00930 | 0.003  |
| 68  | ecp00561 | 0.002  |
| 69  | ecp00720 | 0.002  |
| 70  | ecp00401 | 0.002  |
| 71  | ecp00680 | 0.001  |
| 72  | ecp00970 | 0      |
| 73  | ecp02020 | 0      |
| 74  | ecp01053 | 0      |
| 75  | ecp00280 | -0.001 |
| 76  | ecp00130 | -0.001 |
| 77  | ecp00430 | -0.001 |
| 78  | ecp00627 | -0.001 |
| 79  | ecp00564 | -0.001 |
| 80  | ecp02040 | -0.001 |
| 81  | ecp00053 | -0.001 |
| 82  | ecp00630 | -0.001 |
| 83  | ecp00780 | -0.001 |
| 84  | ecp00363 | -0.002 |
| 85  | ecp00920 | -0.002 |
| 86  | ecp02030 | -0.002 |
| 87  | ecp00903 | -0.002 |
| 88  | ecp00600 | -0.002 |
| 89  | ecp00350 | -0.003 |
| 90  | ecp00640 | -0.004 |
| 91  | ecp00360 | -0.004 |
| 92  | ecp00270 | -0.004 |
| 93  | ecp00460 | -0.005 |
| 94  | ecp00625 | -0.005 |
| 95  | ecp00310 | -0.005 |
| 96  | ecp03430 | -0.005 |
| 97  | ecp00620 | -0.006 |
| 98  | ecp00380 | -0.007 |
| 99  | ecp00626 | -0.007 |
| 100 | ecp00281 | -0.008 |
| 101 | ecp00071 | -0.009 |
| 102 | ecp00650 | -0.011 |
| 103 | ecp00362 | -0.014 |

3. The output of mRMR method for PAE

(1) MaxRel features list

| Order | Name     | Score |
|-------|----------|-------|
| 1     | pae03070 | 0.111 |
| 2     | pae02040 | 0.059 |
| 3     | pae02030 | 0.058 |
| 4     | pae01100 | 0.021 |
| 5     | pae00630 | 0.019 |
| 6     | pae01110 | 0.017 |
| 7     | pae00340 | 0.017 |
| 8     | pae00680 | 0.015 |
| 9     | pae02020 | 0.014 |
| 10    | pae00471 | 0.012 |
| 11    | pae01120 | 0.012 |
| 12    | pae00620 | 0.012 |
| 13    | pae03440 | 0.012 |
| 14    | pae03060 | 0.012 |
| 15    | pae00230 | 0.012 |
| 16    | pae03010 | 0.011 |
| 17    | pae00190 | 0.011 |
| 18    | pae00270 | 0.01  |
| 19    | pae00561 | 0.01  |
| 20    | pae00720 | 0.01  |
| 21    | pae00970 | 0.009 |
| 22    | pae00290 | 0.009 |
| 23    | pae00626 | 0.009 |
| 24    | pae04122 | 0.009 |
| 25    | pae00240 | 0.009 |
| 26    | pae00670 | 0.009 |
| 27    | pae03410 | 0.008 |
| 28    | pae00030 | 0.008 |
| 29    | pae00020 | 0.008 |
| 30    | pae03430 | 0.008 |
| 31    | pae00360 | 0.008 |
| 32    | pae00473 | 0.008 |
| 33    | pae00250 | 0.008 |
| 34    | pae00625 | 0.008 |
| 35    | pae00450 | 0.007 |
| 36    | pae00072 | 0.007 |
| 37    | pae03030 | 0.007 |
| 38    | pae00910 | 0.007 |
| 39    | pae00010 | 0.007 |
| 40    | pae03020 | 0.007 |

|    |          |       |
|----|----------|-------|
| 41 | pae00564 | 0.007 |
| 42 | pae00785 | 0.007 |
| 43 | pae00623 | 0.006 |
| 44 | pae01040 | 0.006 |
| 45 | pae00650 | 0.006 |
| 46 | pae02010 | 0.006 |
| 47 | pae00730 | 0.006 |
| 48 | pae00640 | 0.006 |
| 49 | pae00550 | 0.006 |
| 50 | pae00780 | 0.005 |
| 51 | pae00061 | 0.005 |
| 52 | pae01053 | 0.005 |
| 53 | pae00071 | 0.005 |
| 54 | pae00520 | 0.005 |
| 55 | pae00280 | 0.005 |
| 56 | pae00660 | 0.005 |
| 57 | pae00790 | 0.004 |
| 58 | pae03420 | 0.004 |
| 59 | pae00750 | 0.004 |
| 60 | pae00040 | 0.004 |
| 61 | pae00622 | 0.004 |
| 62 | pae00311 | 0.004 |
| 63 | pae00300 | 0.003 |
| 64 | pae00903 | 0.003 |
| 65 | pae00051 | 0.003 |
| 66 | pae00362 | 0.003 |
| 67 | pae00740 | 0.003 |
| 68 | pae02060 | 0.003 |
| 69 | pae00562 | 0.003 |
| 70 | pae00410 | 0.003 |
| 71 | pae00380 | 0.003 |
| 72 | pae00460 | 0.002 |
| 73 | pae00633 | 0.002 |
| 74 | pae00627 | 0.002 |
| 75 | pae00310 | 0.002 |
| 76 | pae00900 | 0.002 |
| 77 | pae00260 | 0.002 |
| 78 | pae00592 | 0.002 |
| 79 | pae00281 | 0.002 |
| 80 | pae00480 | 0.002 |
| 81 | pae00401 | 0.002 |
| 82 | pae00860 | 0.002 |
| 83 | pae00770 | 0.002 |

|     |          |       |
|-----|----------|-------|
| 84  | pae00330 | 0.001 |
| 85  | pae00361 | 0.001 |
| 86  | pae00930 | 0.001 |
| 87  | pae00760 | 0.001 |
| 88  | pae03018 | 0.001 |
| 89  | pae03450 | 0.001 |
| 90  | pae00440 | 0.001 |
| 91  | pae00565 | 0.001 |
| 92  | pae00364 | 0.001 |
| 93  | pae00053 | 0.001 |
| 94  | pae00130 | 0.001 |
| 95  | pae00791 | 0.001 |
| 96  | pae00350 | 0.001 |
| 97  | pae00643 | 0     |
| 98  | pae00363 | 0     |
| 99  | pae00920 | 0     |
| 100 | pae00430 | 0     |
| 101 | pae00523 | 0     |
| 102 | pae00500 | 0     |
| 103 | pae00624 | 0     |
| 104 | pae00540 | 0     |
| 105 | pae00052 | 0     |
| 106 | pae00521 | 0     |
| 107 | pae00400 | 0     |

(2) mRMR features list

| Order | Name     | Score |
|-------|----------|-------|
| 1     | pae03070 | 0.111 |
| 2     | pae02040 | 0.059 |
| 3     | pae00630 | 0.014 |
| 4     | pae00340 | 0.012 |
| 5     | pae02030 | 0.015 |
| 6     | pae00471 | 0.01  |
| 7     | pae00190 | 0.008 |
| 8     | pae00680 | 0.008 |
| 9     | pae00270 | 0.006 |
| 10    | pae00561 | 0.006 |
| 11    | pae01110 | 0.006 |
| 12    | pae00360 | 0.006 |
| 13    | pae00970 | 0.006 |
| 14    | pae04122 | 0.006 |
| 15    | pae03020 | 0.005 |
| 16    | pae02020 | 0.006 |

|    |          |       |
|----|----------|-------|
| 17 | pae03060 | 0.006 |
| 18 | pae00030 | 0.005 |
| 19 | pae03410 | 0.005 |
| 20 | pae00626 | 0.005 |
| 21 | pae00910 | 0.005 |
| 22 | pae01053 | 0.004 |
| 23 | pae02010 | 0.004 |
| 24 | pae01100 | 0.004 |
| 25 | pae00564 | 0.004 |
| 26 | pae00623 | 0.004 |
| 27 | pae03010 | 0.003 |
| 28 | pae00620 | 0.004 |
| 29 | pae00290 | 0.003 |
| 30 | pae00520 | 0.003 |
| 31 | pae00311 | 0.003 |
| 32 | pae03440 | 0.003 |
| 33 | pae00061 | 0.003 |
| 34 | pae00250 | 0.003 |
| 35 | pae00625 | 0.003 |
| 36 | pae01120 | 0.003 |
| 37 | pae00670 | 0.003 |
| 38 | pae00473 | 0.002 |
| 39 | pae00780 | 0.002 |
| 40 | pae00450 | 0.002 |
| 41 | pae00072 | 0.002 |
| 42 | pae00633 | 0.002 |
| 43 | pae00785 | 0.002 |
| 44 | pae01040 | 0.002 |
| 45 | pae00622 | 0.002 |
| 46 | pae00020 | 0.002 |
| 47 | pae02060 | 0.001 |
| 48 | pae00562 | 0.001 |
| 49 | pae00860 | 0.001 |
| 50 | pae00230 | 0.001 |
| 51 | pae03450 | 0     |
| 52 | pae00790 | 0     |
| 53 | pae00750 | 0     |
| 54 | pae00480 | 0     |
| 55 | pae00440 | 0     |
| 56 | pae00051 | 0     |
| 57 | pae00730 | 0     |
| 58 | pae00401 | 0     |
| 59 | pae00650 | 0     |

|     |          |        |
|-----|----------|--------|
| 60  | pae00791 | -0.001 |
| 61  | pae00010 | -0.001 |
| 62  | pae00550 | -0.001 |
| 63  | pae00363 | -0.001 |
| 64  | pae00460 | -0.001 |
| 65  | pae00565 | -0.001 |
| 66  | pae00720 | -0.001 |
| 67  | pae00130 | -0.001 |
| 68  | pae00260 | -0.001 |
| 69  | pae00040 | -0.001 |
| 70  | pae03430 | -0.001 |
| 71  | pae00660 | -0.001 |
| 72  | pae00361 | -0.001 |
| 73  | pae00624 | -0.002 |
| 74  | pae00640 | -0.002 |
| 75  | pae00760 | -0.002 |
| 76  | pae00350 | -0.002 |
| 77  | pae00540 | -0.002 |
| 78  | pae00920 | -0.002 |
| 79  | pae00430 | -0.002 |
| 80  | pae00592 | -0.002 |
| 81  | pae00740 | -0.002 |
| 82  | pae00643 | -0.002 |
| 83  | pae00330 | -0.003 |
| 84  | pae03030 | -0.003 |
| 85  | pae00071 | -0.003 |
| 86  | pae00300 | -0.003 |
| 87  | pae00500 | -0.003 |
| 88  | pae00627 | -0.003 |
| 89  | pae00590 | -0.003 |
| 90  | pae00523 | -0.004 |
| 91  | pae00770 | -0.004 |
| 92  | pae00400 | -0.004 |
| 93  | pae00280 | -0.004 |
| 94  | pae00364 | -0.004 |
| 95  | pae00052 | -0.005 |
| 96  | pae00240 | -0.005 |
| 97  | pae00900 | -0.006 |
| 98  | pae00053 | -0.006 |
| 99  | pae03420 | -0.006 |
| 100 | pae00362 | -0.006 |
| 101 | pae03018 | -0.007 |
| 102 | pae00903 | -0.007 |

|     |          |        |
|-----|----------|--------|
| 103 | pae00521 | -0.007 |
| 104 | pae00410 | -0.008 |
| 105 | pae00380 | -0.009 |
| 106 | pae00930 | -0.01  |
| 107 | pae00281 | -0.011 |
| 108 | pae00310 | -0.012 |

**Supplementary Materials S2:** The IFS tables for three species.

(1) The IFS table for CJE

| Index | Sensitivity | Specificity | Accuracy |
|-------|-------------|-------------|----------|
| 4     | 0.731959    | 0.938144    | 0.90378  |
| 5     | 0.783505    | 0.954639    | 0.926117 |
| 6     | 0.742268    | 0.948454    | 0.914089 |
| 7     | 0.783505    | 0.950515    | 0.92268  |
| 8     | 0.804124    | 0.948454    | 0.924399 |
| 9     | 0.773196    | 0.956701    | 0.926117 |
| 10    | 0.793814    | 0.964948    | 0.936426 |
| 11    | 0.793814    | 0.956701    | 0.929553 |
| 12    | 0.814433    | 0.973196    | 0.946735 |
| 13    | 0.814433    | 0.969072    | 0.943299 |
| 14    | 0.824742    | 0.964948    | 0.941581 |
| 15    | 0.793814    | 0.964948    | 0.936426 |
| 16    | 0.773196    | 0.952577    | 0.92268  |
| 17    | 0.824742    | 0.956701    | 0.934708 |
| 18    | 0.804124    | 0.964948    | 0.938144 |
| 19    | 0.824742    | 0.964948    | 0.941581 |
| 20    | 0.783505    | 0.958763    | 0.929553 |
| 21    | 0.773196    | 0.960825    | 0.929553 |
| 22    | 0.742268    | 0.958763    | 0.92268  |
| 23    | 0.762887    | 0.956701    | 0.924399 |
| 24    | 0.762887    | 0.960825    | 0.927835 |
| 25    | 0.793814    | 0.958763    | 0.931271 |
| 26    | 0.783505    | 0.960825    | 0.931271 |
| 27    | 0.804124    | 0.962887    | 0.936426 |
| 28    | 0.793814    | 0.962887    | 0.934708 |
| 29    | 0.773196    | 0.962887    | 0.931271 |
| 30    | 0.783505    | 0.960825    | 0.931271 |
| 31    | 0.742268    | 0.960825    | 0.924399 |
| 32    | 0.783505    | 0.962887    | 0.93299  |
| 33    | 0.783505    | 0.960825    | 0.931271 |
| 34    | 0.742268    | 0.964948    | 0.927835 |
| 35    | 0.742268    | 0.96701     | 0.929553 |
| 36    | 0.731959    | 0.958763    | 0.920962 |
| 37    | 0.783505    | 0.964948    | 0.934708 |
| 38    | 0.773196    | 0.971134    | 0.938144 |
| 39    | 0.752577    | 0.960825    | 0.926117 |
| 40    | 0.773196    | 0.962887    | 0.931271 |
| 41    | 0.783505    | 0.962887    | 0.93299  |



|    |          |          |          |
|----|----------|----------|----------|
| 42 | 0.762887 | 0.962887 | 0.929553 |
| 43 | 0.773196 | 0.969072 | 0.936426 |
| 44 | 0.783505 | 0.958763 | 0.929553 |
| 45 | 0.793814 | 0.960825 | 0.93299  |
| 46 | 0.752577 | 0.964948 | 0.929553 |
| 47 | 0.773196 | 0.964948 | 0.93299  |
| 48 | 0.783505 | 0.964948 | 0.934708 |
| 49 | 0.71134  | 0.954639 | 0.914089 |
| 50 | 0.762887 | 0.946392 | 0.915808 |
| 51 | 0.783505 | 0.960825 | 0.931271 |
| 52 | 0.773196 | 0.971134 | 0.938144 |
| 53 | 0.731959 | 0.960825 | 0.92268  |
| 54 | 0.742268 | 0.954639 | 0.919244 |
| 55 | 0.773196 | 0.969072 | 0.936426 |
| 56 | 0.752577 | 0.964948 | 0.929553 |
| 57 | 0.731959 | 0.975258 | 0.934708 |
| 58 | 0.752577 | 0.975258 | 0.938144 |
| 59 | 0.659794 | 0.969072 | 0.917526 |
| 60 | 0.783505 | 0.969072 | 0.938144 |
| 61 | 0.773196 | 0.973196 | 0.939863 |
| 62 | 0.773196 | 0.958763 | 0.927835 |
| 63 | 0.742268 | 0.962887 | 0.926117 |
| 64 | 0.752577 | 0.964948 | 0.929553 |
| 65 | 0.742268 | 0.958763 | 0.92268  |
| 66 | 0.752577 | 0.962887 | 0.927835 |
| 67 | 0.752577 | 0.973196 | 0.936426 |
| 68 | 0.71134  | 0.975258 | 0.931271 |
| 69 | 0.793814 | 0.960825 | 0.93299  |
| 70 | 0.742268 | 0.971134 | 0.93299  |
| 71 | 0.804124 | 0.969072 | 0.941581 |
| 72 | 0.752577 | 0.960825 | 0.926117 |
| 73 | 0.773196 | 0.981443 | 0.946735 |
| 74 | 0.752577 | 0.969072 | 0.93299  |
| 75 | 0.752577 | 0.973196 | 0.936426 |
| 76 | 0.762887 | 0.973196 | 0.938144 |
| 77 | 0.701031 | 0.971134 | 0.926117 |
| 78 | 0.762887 | 0.964948 | 0.931271 |
| 79 | 0.659794 | 0.973196 | 0.920962 |
| 80 | 0.742268 | 0.971134 | 0.93299  |
| 81 | 0.752577 | 0.969072 | 0.93299  |

(2) The IFS table for ECP

| Index | Sensitivity | Specificity | Accuracy |
|-------|-------------|-------------|----------|
| 4     | 0.718954    | 0.935948    | 0.899782 |
| 5     | 0.712418    | 0.935948    | 0.898693 |
| 6     | 0.751634    | 0.941176    | 0.909586 |
| 7     | 0.751634    | 0.946405    | 0.913943 |
| 8     | 0.738562    | 0.94902     | 0.913943 |
| 9     | 0.745098    | 0.952941    | 0.918301 |
| 10    | 0.75817     | 0.94902     | 0.917211 |
| 11    | 0.745098    | 0.952941    | 0.918301 |
| 12    | 0.764706    | 0.946405    | 0.916122 |
| 13    | 0.75817     | 0.956863    | 0.923747 |
| 14    | 0.745098    | 0.956863    | 0.921569 |
| 15    | 0.72549     | 0.956863    | 0.918301 |
| 16    | 0.72549     | 0.955556    | 0.917211 |
| 17    | 0.738562    | 0.950327    | 0.915033 |
| 18    | 0.738562    | 0.956863    | 0.920479 |
| 19    | 0.784314    | 0.952941    | 0.924837 |
| 20    | 0.79085     | 0.966013    | 0.936819 |
| 21    | 0.771242    | 0.964706    | 0.932462 |
| 22    | 0.751634    | 0.955556    | 0.921569 |
| 23    | 0.745098    | 0.960784    | 0.924837 |
| 24    | 0.72549     | 0.95817     | 0.91939  |
| 25    | 0.751634    | 0.95817     | 0.923747 |
| 26    | 0.751634    | 0.951634    | 0.918301 |
| 27    | 0.771242    | 0.956863    | 0.925926 |
| 28    | 0.751634    | 0.962092    | 0.927015 |
| 29    | 0.751634    | 0.962092    | 0.927015 |
| 30    | 0.732026    | 0.960784    | 0.922658 |
| 31    | 0.738562    | 0.969935    | 0.931373 |
| 32    | 0.705882    | 0.968627    | 0.924837 |
| 33    | 0.75817     | 0.959477    | 0.925926 |
| 34    | 0.738562    | 0.96732     | 0.929194 |
| 35    | 0.810458    | 0.966013    | 0.940087 |
| 36    | 0.75817     | 0.960784    | 0.927015 |
| 37    | 0.784314    | 0.96732     | 0.936819 |
| 38    | 0.79085     | 0.963399    | 0.934641 |
| 39    | 0.777778    | 0.969935    | 0.937908 |
| 40    | 0.751634    | 0.964706    | 0.929194 |
| 41    | 0.823529    | 0.962092    | 0.938998 |
| 42    | 0.79085     | 0.968627    | 0.938998 |
| 43    | 0.830065    | 0.969935    | 0.946623 |

|    |          |          |          |
|----|----------|----------|----------|
| 44 | 0.803922 | 0.969935 | 0.942266 |
| 45 | 0.830065 | 0.966013 | 0.943355 |
| 46 | 0.784314 | 0.96732  | 0.936819 |
| 47 | 0.784314 | 0.971242 | 0.940087 |
| 48 | 0.784314 | 0.971242 | 0.940087 |
| 49 | 0.823529 | 0.969935 | 0.945534 |
| 50 | 0.777778 | 0.973856 | 0.941176 |
| 51 | 0.784314 | 0.962092 | 0.932462 |
| 52 | 0.816993 | 0.963399 | 0.938998 |
| 53 | 0.777778 | 0.964706 | 0.933551 |
| 54 | 0.849673 | 0.969935 | 0.949891 |
| 55 | 0.751634 | 0.969935 | 0.933551 |
| 56 | 0.79085  | 0.966013 | 0.936819 |
| 57 | 0.777778 | 0.96732  | 0.93573  |
| 58 | 0.784314 | 0.963399 | 0.933551 |
| 59 | 0.823529 | 0.971242 | 0.946623 |
| 60 | 0.823529 | 0.972549 | 0.947712 |
| 61 | 0.79085  | 0.969935 | 0.940087 |
| 62 | 0.797386 | 0.969935 | 0.941176 |
| 63 | 0.797386 | 0.966013 | 0.937908 |
| 64 | 0.797386 | 0.973856 | 0.944444 |
| 65 | 0.79085  | 0.968627 | 0.938998 |
| 66 | 0.79085  | 0.963399 | 0.934641 |
| 67 | 0.836601 | 0.977778 | 0.954248 |
| 68 | 0.823529 | 0.973856 | 0.948802 |
| 69 | 0.777778 | 0.966013 | 0.934641 |
| 70 | 0.843137 | 0.968627 | 0.947712 |
| 71 | 0.797386 | 0.969935 | 0.941176 |
| 72 | 0.823529 | 0.969935 | 0.945534 |
| 73 | 0.797386 | 0.972549 | 0.943355 |
| 74 | 0.810458 | 0.972549 | 0.945534 |
| 75 | 0.803922 | 0.969935 | 0.942266 |
| 76 | 0.862745 | 0.976471 | 0.957516 |
| 77 | 0.843137 | 0.96732  | 0.946623 |
| 78 | 0.830065 | 0.968627 | 0.945534 |
| 79 | 0.797386 | 0.973856 | 0.944444 |
| 80 | 0.823529 | 0.969935 | 0.945534 |
| 81 | 0.816993 | 0.96732  | 0.942266 |
| 82 | 0.784314 | 0.977778 | 0.945534 |
| 83 | 0.784314 | 0.968627 | 0.937908 |
| 84 | 0.79085  | 0.971242 | 0.941176 |
| 85 | 0.856209 | 0.975163 | 0.955338 |
| 86 | 0.862745 | 0.975163 | 0.956427 |

|     |          |          |          |
|-----|----------|----------|----------|
| 87  | 0.843137 | 0.968627 | 0.947712 |
| 88  | 0.810458 | 0.969935 | 0.943355 |
| 89  | 0.823529 | 0.975163 | 0.949891 |
| 90  | 0.823529 | 0.971242 | 0.946623 |
| 91  | 0.797386 | 0.969935 | 0.941176 |
| 92  | 0.823529 | 0.977778 | 0.95207  |
| 93  | 0.797386 | 0.969935 | 0.941176 |
| 94  | 0.75817  | 0.964706 | 0.930283 |
| 95  | 0.843137 | 0.977778 | 0.955338 |
| 96  | 0.797386 | 0.96732  | 0.938998 |
| 97  | 0.803922 | 0.975163 | 0.946623 |
| 98  | 0.823529 | 0.973856 | 0.948802 |
| 99  | 0.784314 | 0.968627 | 0.937908 |
| 100 | 0.803922 | 0.96732  | 0.940087 |
| 101 | 0.810458 | 0.966013 | 0.940087 |
| 102 | 0.797386 | 0.968627 | 0.940087 |
| 103 | 0.797386 | 0.968627 | 0.940087 |

(3) The IFS table for PAE

| Index | Sensitivity | Specificity | Accuracy |
|-------|-------------|-------------|----------|
| 4     | 0.52381     | 0.948148    | 0.877425 |
| 5     | 0.529101    | 0.953439    | 0.882716 |
| 6     | 0.529101    | 0.951323    | 0.880952 |
| 7     | 0.507937    | 0.951323    | 0.877425 |
| 8     | 0.518519    | 0.960847    | 0.887125 |
| 9     | 0.534392    | 0.962963    | 0.891534 |
| 10    | 0.52381     | 0.965079    | 0.891534 |
| 11    | 0.52381     | 0.969312    | 0.895062 |
| 12    | 0.539683    | 0.962963    | 0.892416 |
| 13    | 0.539683    | 0.967196    | 0.895944 |
| 14    | 0.513228    | 0.967196    | 0.891534 |
| 15    | 0.550265    | 0.965079    | 0.895944 |
| 16    | 0.555556    | 0.959788    | 0.892416 |
| 17    | 0.539683    | 0.971429    | 0.899471 |
| 18    | 0.550265    | 0.966138    | 0.896825 |
| 19    | 0.555556    | 0.97037     | 0.901235 |
| 20    | 0.555556    | 0.965079    | 0.896825 |
| 21    | 0.550265    | 0.969312    | 0.899471 |
| 22    | 0.587302    | 0.965079    | 0.902116 |
| 23    | 0.592593    | 0.978836    | 0.914462 |
| 24    | 0.560847    | 0.971429    | 0.902998 |

|    |          |          |          |
|----|----------|----------|----------|
| 25 | 0.592593 | 0.969312 | 0.906526 |
| 26 | 0.603175 | 0.964021 | 0.90388  |
| 27 | 0.571429 | 0.972487 | 0.905644 |
| 28 | 0.566138 | 0.97037  | 0.902998 |
| 29 | 0.571429 | 0.968254 | 0.902116 |
| 30 | 0.560847 | 0.977778 | 0.908289 |
| 31 | 0.619048 | 0.966138 | 0.908289 |
| 32 | 0.592593 | 0.974603 | 0.910935 |
| 33 | 0.613757 | 0.967196 | 0.908289 |
| 34 | 0.592593 | 0.969312 | 0.906526 |
| 35 | 0.582011 | 0.971429 | 0.906526 |
| 36 | 0.587302 | 0.974603 | 0.910053 |
| 37 | 0.592593 | 0.968254 | 0.905644 |
| 38 | 0.571429 | 0.971429 | 0.904762 |
| 39 | 0.560847 | 0.975661 | 0.906526 |
| 40 | 0.555556 | 0.978836 | 0.908289 |
| 41 | 0.597884 | 0.973545 | 0.910935 |
| 42 | 0.544974 | 0.973545 | 0.902116 |
| 43 | 0.57672  | 0.972487 | 0.906526 |
| 44 | 0.587302 | 0.972487 | 0.908289 |
| 45 | 0.57672  | 0.965079 | 0.900353 |
| 46 | 0.566138 | 0.973545 | 0.905644 |
| 47 | 0.571429 | 0.969312 | 0.902998 |
| 48 | 0.566138 | 0.977778 | 0.909171 |
| 49 | 0.571429 | 0.969312 | 0.902998 |
| 50 | 0.555556 | 0.962963 | 0.895062 |
| 51 | 0.582011 | 0.971429 | 0.906526 |
| 52 | 0.555556 | 0.969312 | 0.900353 |
| 53 | 0.534392 | 0.972487 | 0.899471 |
| 54 | 0.608466 | 0.967196 | 0.907407 |
| 55 | 0.544974 | 0.972487 | 0.901235 |
| 56 | 0.603175 | 0.97037  | 0.909171 |
| 57 | 0.518519 | 0.978836 | 0.902116 |
| 58 | 0.608466 | 0.972487 | 0.911817 |
| 59 | 0.544974 | 0.973545 | 0.902116 |
| 60 | 0.587302 | 0.973545 | 0.909171 |
| 61 | 0.608466 | 0.97037  | 0.910053 |
| 62 | 0.518519 | 0.968254 | 0.893298 |
| 63 | 0.582011 | 0.971429 | 0.906526 |
| 64 | 0.529101 | 0.974603 | 0.900353 |
| 65 | 0.592593 | 0.983069 | 0.917989 |
| 66 | 0.571429 | 0.966138 | 0.900353 |
| 67 | 0.529101 | 0.982011 | 0.906526 |

|     |          |          |          |
|-----|----------|----------|----------|
| 68  | 0.52381  | 0.969312 | 0.895062 |
| 69  | 0.534392 | 0.972487 | 0.899471 |
| 70  | 0.544974 | 0.974603 | 0.902998 |
| 71  | 0.555556 | 0.971429 | 0.902116 |
| 72  | 0.529101 | 0.969312 | 0.895944 |
| 73  | 0.555556 | 0.973545 | 0.90388  |
| 74  | 0.539683 | 0.975661 | 0.902998 |
| 75  | 0.52381  | 0.973545 | 0.898589 |
| 76  | 0.507937 | 0.977778 | 0.899471 |
| 77  | 0.534392 | 0.965079 | 0.893298 |
| 78  | 0.52381  | 0.97037  | 0.895944 |
| 79  | 0.534392 | 0.980952 | 0.906526 |
| 80  | 0.566138 | 0.975661 | 0.907407 |
| 81  | 0.529101 | 0.971429 | 0.897707 |
| 82  | 0.555556 | 0.975661 | 0.905644 |
| 83  | 0.550265 | 0.974603 | 0.90388  |
| 84  | 0.518519 | 0.974603 | 0.898589 |
| 85  | 0.566138 | 0.973545 | 0.905644 |
| 86  | 0.502646 | 0.971429 | 0.893298 |
| 87  | 0.513228 | 0.972487 | 0.895944 |
| 88  | 0.534392 | 0.974603 | 0.901235 |
| 89  | 0.529101 | 0.969312 | 0.895944 |
| 90  | 0.52381  | 0.977778 | 0.902116 |
| 91  | 0.550265 | 0.969312 | 0.899471 |
| 92  | 0.550265 | 0.974603 | 0.90388  |
| 93  | 0.539683 | 0.974603 | 0.902116 |
| 94  | 0.529101 | 0.97672  | 0.902116 |
| 95  | 0.518519 | 0.975661 | 0.899471 |
| 96  | 0.529101 | 0.971429 | 0.897707 |
| 97  | 0.534392 | 0.985185 | 0.910053 |
| 98  | 0.529101 | 0.97672  | 0.902116 |
| 99  | 0.534392 | 0.972487 | 0.899471 |
| 100 | 0.502646 | 0.984127 | 0.90388  |
| 101 | 0.550265 | 0.971429 | 0.901235 |
| 102 | 0.544974 | 0.973545 | 0.902116 |
| 103 | 0.518519 | 0.975661 | 0.899471 |
| 104 | 0.497354 | 0.977778 | 0.897707 |
| 105 | 0.539683 | 0.983069 | 0.909171 |
| 106 | 0.518519 | 0.97672  | 0.900353 |
| 107 | 0.550265 | 0.974603 | 0.90388  |
| 108 | 0.555556 | 0.977778 | 0.907407 |

**Supplementary Materials S3:** The important KEGG pathways and their classes for identification of virulence factors of three species.

1. KEGG pathways and their classes for CJE

| <b>Index</b> | <b>Feature name</b> | <b>Pathway name</b>                         | <b>Class</b>                         |
|--------------|---------------------|---------------------------------------------|--------------------------------------|
| 1            | cje02040            | Flagellar assembly                          | Cellular Processes                   |
| 2            | cje00521            | Streptomycin biosynthesis                   | Metabolism                           |
| 3            | cje03018            | RNA degradation                             | Genetic Information Processing       |
| 4            | cje00520            | Amino sugar and nucleotide sugar metabolism | Metabolism                           |
| 5            | cje02030            | Bacterial chemotaxis                        | Cellular Processes                   |
| 6            | cje00040            | Pentose and glucuronate interconversions    | Metabolism                           |
| 7            | cje03440            | Homologous recombination                    | Genetic Information Processing       |
| 8            | cje00540            | Lipopolysaccharide biosynthesis             | Metabolism                           |
| 9            | cje00010            | Glycolysis / Gluconeogenesis                | Metabolism                           |
| 10           | cje00650            | Butanoate metabolism                        | Metabolism                           |
| 11           | cje02020            | Two-component system                        | Environmental Information Processing |
| 12           | cje00523            | Polyketide sugar unit biosynthesis          | Metabolism                           |

2. KEGG pathways and their classes for ECP

| <b>Index</b> | <b>Feature name</b> | <b>Pathway name</b>                   | <b>Class</b>                         |
|--------------|---------------------|---------------------------------------|--------------------------------------|
| 1            | ecp03070            | Bacterial secretion system            | Environmental Information Processing |
| 2            | ecp01100            | Metabolic pathways                    | Metabolism                           |
| 3            | ecp01110            | Biosynthesis of secondary metabolites | Metabolism                           |
| 4            | ecp03020            | RNA polymerase                        | Genetic Information Processing       |
| 5            | ecp00340            | Histidine metabolism                  | Metabolism                           |
| 6            | ecp00900            | Terpenoid backbone biosynthesis       | Metabolism                           |
| 7            | ecp02010            | ABC transporters                      | Environmental Information Processing |

|    |          |                                              |                                |
|----|----------|----------------------------------------------|--------------------------------|
| 8  | ecp00300 | Lysine biosynthesis                          | Metabolism                     |
| 9  | ecp00230 | Purine metabolism                            | Metabolism                     |
| 10 | ecp00440 | Phosphonate and phosphinate metabolism       | Metabolism                     |
| 11 | ecp03060 | Protein export                               | Genetic Information Processing |
| 12 | ecp00240 | Pyrimidine metabolism                        | Metabolism                     |
| 13 | ecp00660 | C5-Branched dibasic acid metabolism          | Metabolism                     |
| 14 | ecp00520 | Amino sugar and nucleotide sugar metabolism  | Metabolism                     |
| 15 | ecp00523 | Polyketide sugar unit biosynthesis           | Metabolism                     |
| 16 | ecp01120 | Microbial metabolism in diverse environments | Metabolism                     |
| 17 | ecp00190 | Oxidative phosphorylation                    | Metabolism                     |
| 18 | ecp00670 | One carbon pool by folate                    | Metabolism                     |
| 19 | ecp00623 | Toluene degradation                          | Metabolism                     |
| 20 | ecp03420 | Nucleotide excision repair                   | Genetic Information Processing |
| 21 | ecp00521 | Streptomycin biosynthesis                    | Metabolism                     |

### 3. KEGG pathways and their classes for PAE

| <b>Index</b> | <b>Feature name</b> | <b>Pathway name</b>                          | <b>Class</b>                         |
|--------------|---------------------|----------------------------------------------|--------------------------------------|
| 1            | pae03070            | Bacterial secretion system                   | Environmental Information Processing |
| 2            | pae02040            | Flagellar assembly                           | Cellular Processes                   |
| 3            | pae02030            | Bacterial chemotaxis                         | Cellular Processes                   |
| 4            | pae01100            | Metabolic pathways                           | Metabolism                           |
| 5            | pae00630            | Glyoxylate and dicarboxylate metabolism      | Metabolism                           |
| 6            | pae01110            | Biosynthesis of secondary metabolites        | Metabolism                           |
| 7            | pae00340            | Histidine metabolism                         | Metabolism                           |
| 8            | pae00680            | Methane metabolism                           | Metabolism                           |
| 9            | pae02020            | Two-component system                         | Environmental Information Processing |
| 10           | pae00471            | D-Glutamine and D-glutamate metabolism       | Metabolism                           |
| 11           | pae01120            | Microbial metabolism in diverse environments | Metabolism                           |
| 12           | pae00620            | Pyruvate metabolism                          | Metabolism                           |



|    |          |                                             |                                |
|----|----------|---------------------------------------------|--------------------------------|
| 13 | pae03440 | Homologous recombination                    | Genetic Information Processing |
| 14 | pae03060 | Protein export                              | Genetic Information Processing |
| 15 | pae00230 | Purine metabolism                           | Metabolism                     |
| 16 | pae03010 | Ribosome                                    | Genetic Information Processing |
| 17 | pae00190 | Oxidative phosphorylation                   | Metabolism                     |
| 18 | pae00270 | Cysteine and methionine metabolism          | Metabolism                     |
| 19 | pae00561 | Glycerolipid metabolism                     | Metabolism                     |
| 20 | pae00720 | Carbon fixation pathways in prokaryotes     | Metabolism                     |
| 21 | pae00970 | Aminoacyl-tRNA biosynthesis                 | Genetic Information Processing |
| 22 | pae00290 | Valine, leucine and isoleucine biosynthesis | Metabolism                     |
